# Supplementary material
Source: PubMed Central journal article supplement (PMC2234058)
Supplement: blood_blood-2007-06-097253_1.pdf [file blood_blood-2007-06-097253_1.pdf]

|               |                                |
|---------------|--------------------------------|
| EPHA4 QPCR F1 | CAT GAA GCT GAA CAC CGA GAT CC |
| EPHA4 QPCR R1 | ACA CAG GAG CCT CGA ACT TCC    |
| JAK1 QPCR F1  | AGC GAT GTC CTT ACC ACA CC     |
| JAK1 QPCR R1  | CCT CAA CAC ACT CAG GAG CA     |
| JAK2 QPCR F2  | ATC TGG TAT CCA CCC AAC CA     |
| JAK2 QPCR R2  | CTG TTG CTG CCA CTG CAA TAC C  |
| JAK3 QPCR F1  | AGT CCA ACC TGA TCG TGG TC     |
| JAK3 QPCR R1  | TGG CAT CCA TGA CCT TCA GCA    |
| LYN QPCR F1   | ACC AAG GTG GCT GTG AAA AC     |
| LYN QPCR R1   | ACC TTC ATC GCT CTT CAG GA     |
| PTK2 QPCR F1  | CTG GTG CAA TGG AGC GAG TAT T  |
| PTK2 QPCR R1  | AGC CAG TGA ACC TCC TCT GA     |
| PTK2B QPCR F2 | ACA GGA CCA CGC TGC TCT AT     |
| PTK2B QPCR R2 | GCC CCA CTT CCT TTT CTA GG     |
| PTK6 QPCR F1  | GCG TGT GCT CCT CTC CTT AC     |
| PTK6 QPCR R1  | CCA AGC TGA ACT GGG AAG AG     |
| PTK9 QPCR F1  | CCC AAG GAT TCA GCT CGT TA     |
| PTK9 QPCR R1  | GCA GTC AAC TCA TCC CCA TT     |
| SRC QPCR F2   | AGG CAT CAT GGA AAG ACT GG     |
| SRC QPCR R2   | GCT GGC TCT GAA GGT CAA AC     |
